# Supplementary material for: Circadian control of a sex-specific behaviour in Drosophila
Source: Research Square preprint supplement (doi:10.21203/rs.3.rs-4176848/v1), 2024-04-30
Supplement: Supplementary file 1 [file 87349040364cbde3d17441b9.pdf]

13

14

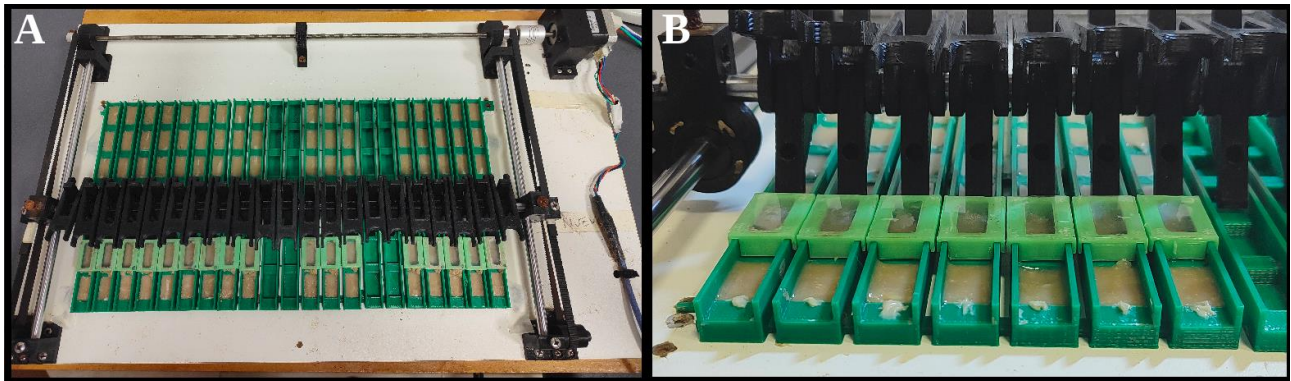

15

16 **Supplementary Figure S2. Oviposition device. A:** View from above. The white square is the wooden  
17 base to which there are two bars attached that hold the mechanical arm (in black), moved by a  
18 stepper motor (black box in the upper left corner). The arm shifts forward (downward in the picture)  
19 each fly chamber (light green box) from one well to the next. **B:** Detail of the tracks (dark green)  
20 holding the fly chambers, and the food wells filled with banana medium (brown) and a drop of yeast  
21 (white).

22
